# Supplementary material for: Prevalence ofMycoplasma genitaliuminfection among HIV PrEP users: a systematic review and meta-analysis
Source: HighWire-hosted journal article supplement (doi:10.1136/sextrans-2022-055687), 2023-02-09
Supplement: sextrans-2022-055687supp005_data_supplement.pdf [file sextrans-2022-055687supp005_data_supplement.pdf]

**Supplementary material 5: Quality of evidence assessment with GRADE.**

| n of participants<br>(n of studies)                              | Risk of bias         | Inconsistency | Indirectness | Imprecision               | Publication bias | Quality of evidence | Summary of evidence                            |
|------------------------------------------------------------------|----------------------|---------------|--------------|---------------------------|------------------|---------------------|------------------------------------------------|
| <b>MG infection - point prevalence</b>                           |                      |               |              |                           |                  |                     |                                                |
| 2,135 participants<br>(12 studies)                               | serious <sup>a</sup> | not serious   | not serious  | not serious               | not detected     | ⊕⊕⊕<br>MODERATE     | 16.68% (95%CI 13.57-20.33)<br>95%PI 8.15-31.09 |
| <b>Macrolide-resistant MG infection - point prevalence</b>       |                      |               |              |                           |                  |                     |                                                |
| 63 participants<br>(3 studies)                                   | serious <sup>a</sup> | not serious   | not serious  | serious <sup>b</sup>      | not detected     | ⊕⊕<br>LOW           | 82.58% (95%CI 70.07-90.57)<br>95%PI 4.66-99.78 |
| <b>Fluoroquinolone-resistant MG infection - point prevalence</b> |                      |               |              |                           |                  |                     |                                                |
| 14 participants<br>(1 study)                                     | serious <sup>a</sup> | not serious   | not serious  | very serious <sup>c</sup> | not detected     | ⊕<br>VERY LOW       | 14.29% (95%CI 1.78-42.81)                      |

95%CI: 95% confidence interval; 95%PI: 95% prediction interval; MG: *Mycoplasma genitalium*.

<sup>a</sup> Studies presented important risk of bias arising from the identification and inclusion of participants in the sample, which may lead to differences between the sample evaluated and the target population.

<sup>b</sup> Few patients included in the analysis and wide confidence interval.

<sup>c</sup> Very few patients included in the analysis and very wide confidence interval.
