# Supplementary material for: Prevalence ofMycoplasma genitaliuminfection among HIV PrEP users: a systematic review and meta-analysis
Source: HighWire-hosted journal article supplement (doi:10.1136/sextrans-2022-055687), 2023-02-09

## Supplementary Material 6: Sensitivity analyses.

**Figure 1:** Prevalence of MG infection among PrEP users, estimated with Freeman-Tukey double arcsine as the transformation method for prevalence estimates.

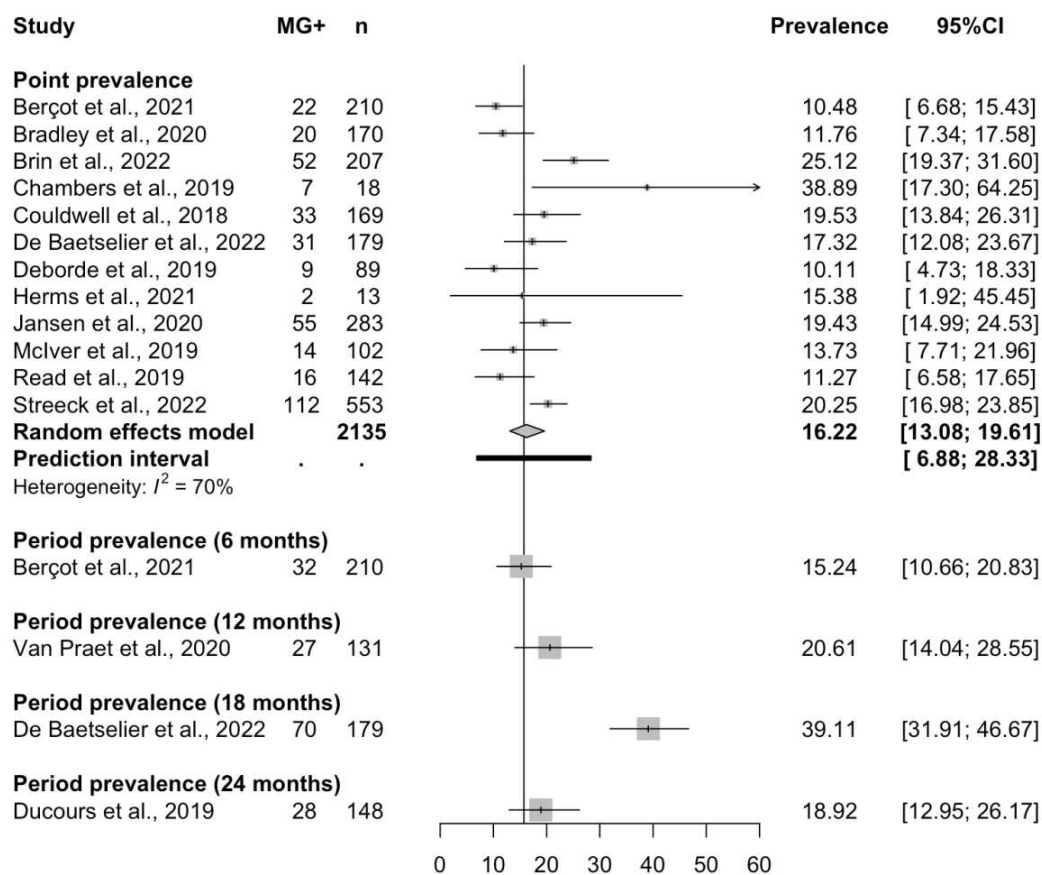

**Figure 2:** Prevalence of macrolide-resistant MG infection among PrEP users, estimated with Freeman-Tukey double arcsine as the transformation method for prevalence estimates.

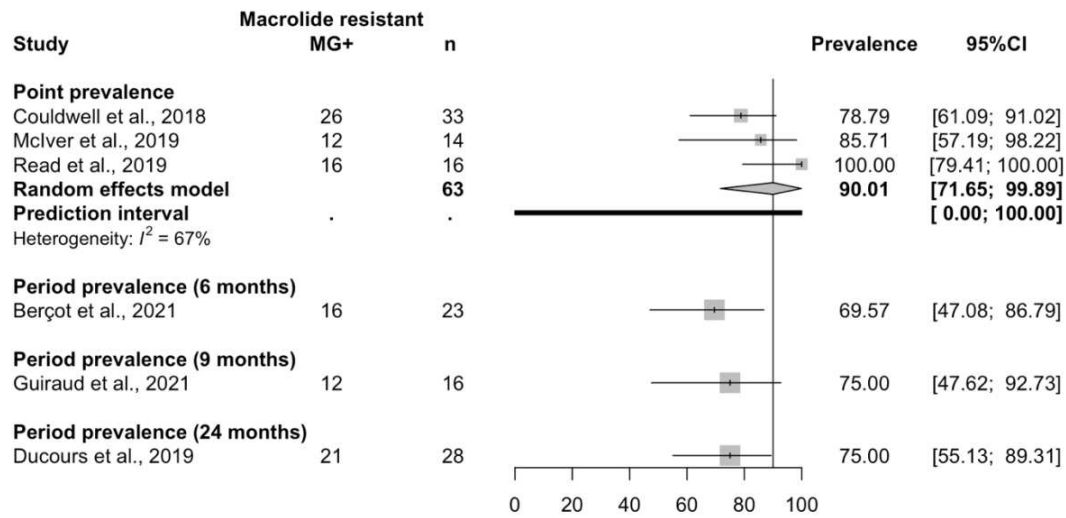

Supplement: sextrans-2022-055687supp006_data_supplement.pdf [file sextrans-2022-055687supp006_data_supplement.pdf]
