# Supplementary material for: Prevalence ofMycoplasma genitaliuminfection among HIV PrEP users: a systematic review and meta-analysis
Source: HighWire-hosted journal article supplement (doi:10.1136/sextrans-2022-055687), 2023-02-09
Supplement: sextrans-2022-055687supp009_data_supplement.pdf [file sextrans-2022-055687supp009_data_supplement.pdf]

## 1 ZUSAMMENFASSUNG

2 **Ziele:** Zusammenfassung der Prävalenz von Mycoplasma genitalium (MG) und  
3 antibiotikaresistenter MG-Infektion bei Nutzer\*innen der HIV-Präexpositionsprophylaxe  
4 (PrEP).

5 **Methoden:** Es wurde eine Recherche in den elektronischen Datenbanken MEDLINE, Embase,  
6 Web of Science und Global Index Medicus bis zum 30. September 2022 durchgeführt.  
7 Eingeschlossen wurden Studien zur Prävalenz von MG und/oder antibiotikaresistenten MG-  
8 Infektionen bei PrEP-Nutzenden. Zwei unabhängige Reviewer identifizierten Studien und  
9 extrahierten Daten. Es wurde ein systematischer Review und eine Metaanalyse mit zufälligen  
10 Effekten durchgeführt, um die Ergebnisse quantitativ zu synthetisieren. Es erfolgte eine  
11 kritische Bewertung der eingeschlossenen Studien anhand der JBI-Checkliste für  
12 Prävalenzstudien und eine Bewertung der Qualität der Evidenz mittels GRADE.

13 **Ergebnisse:** Insgesamt wurden 15 Studien in den systematischen Review eingeschlossen,  
14 welche 2.341 PrEP-Nutzende erfassten. Diese Studien wurden in Ländern mit hohem  
15 Einkommensniveau zwischen 2014 und 2019 durchgeführt. Das mediane Alter der  
16 Teilnehmenden lag zwischen 23,5 und 40 Jahren. Die meisten Teilnehmenden waren männlich  
17 (85%), und 93% von ihnen waren Männer, die Sex mit Männern haben (MSM). Zum Nachweis  
18 von MG wurden in 14 Studien Urinproben, in 12 Studien rektale oder anale Abstriche, in neun  
19 Studien orale oder pharyngeale Abstriche und in drei Studien urethrale oder vaginale Abstriche  
20 untersucht. Die gepoolte Punktprävalenz von MG unter PrEP-Nutzenden betrug 16,7% (95%-  
21 Konfidenzintervall [95%KI] 13,6-20,3; 95%-Vorhersageintervall [95%VI] 8,2-31,1). Die  
22 gepoolte Punktprävalenz von makrolidresistenten Infektionen lag bei 82,6% (95%KI 70,1-  
23 90,6; 95%VI 4,7-99,8) und die Prävalenz von fluorochinolonresistenten Infektionen bei 14,3%  
24 (95%KI 1,8-42,8). PrEP-Nutzende haben ein höheres Risiko, sich mit MG zu infizieren, als  
25 Personen, die keine PrEP einnehmen (Odds Ratio [OR] 2,30; 95%KI 1,6-3,4). Die Qualität der  
26 Evidenz reichte von sehr niedrig bis zu moderat.

27 **Schlussfolgerung:** Es wurde eine hohe Prävalenz von MG und Makrolidresistenz unter PrEP-  
28 Nutzenden beobachtet. Dies unterstreicht die Notwendigkeit, Präventionsstrategien gegen  
29 sexuell übertragbare Infektionen in dieser Bevölkerungsgruppe zu verstärken.

30

31 **Schlüsselwörter:** Mycoplasma genitalium, Arzneimittelresistenz, antimikrobielle Resistenz,  
32 HIV-Präexpositionsprophylaxe, PrEP, Prävalenz
