# Supplementary figures and images for: Prevalence ofMycoplasma genitaliuminfection among HIV PrEP users: a systematic review and meta-analysis
Source: HighWire-hosted journal article supplement (doi:10.1136/sextrans-2022-055687), 2023-02-09

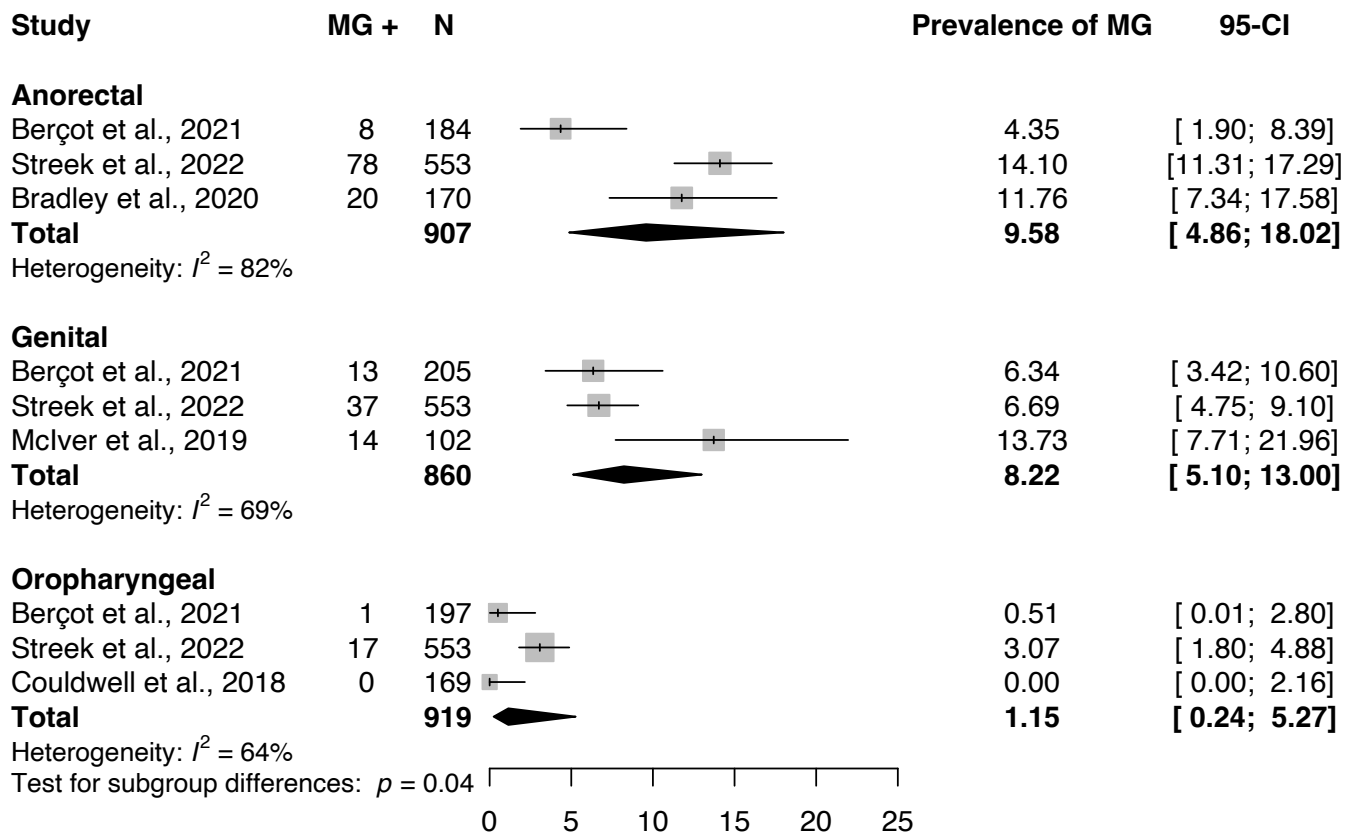

Supplement: sextrans-2022-055687supp007_data_supplement.pdf [file sextrans-2022-055687supp007_data_supplement.pdf]



Supplement: sextrans-2022-055687supp007_data_supplement.pdf [file sextrans-2022-055687supp007_data_supplement.pdf]
